# Supplementary material for: OpenABM-Covid19—An agent-based model for non-pharmaceutical interventions against COVID-19 including contact tracing
Source: PLoS Comput Biol. 2021 Jul 12;17(7):e1009146. doi: 10.1371/journal.pcbi.1009146 (PMC8328312; doi:10.1371/journal.pcbi.1009146)
Supplement: S6 Table — The mean of the generation time distribution and the standard deviation of the infectious period were calculated from [7,45–48]. Parameter values match the OpenABM-Covid19 baseline parameters, April 25, 2020. (CSV) [file pcbi.1009146.s028.csv]

Description	Value	Source
Number of infections seeded at simulation start	10	-
Mean of the generation time distribution (days),5.5,"[7, 45-48]"
Standard deviation (days) of infectious period,2.14,"[7, 45-48]"
Mean number of individuals infected by each infectious individual with moderate to severe symptoms	5.8	Derived from calibration to doubling time
Relative infectivity of asymptomatic individuals relative to symptomatic individuals,0.33,"Personal communication, [34]"
Relative infectivity of mildly symptomatic individuals relative to symptomatic individuals,0.72,"Personal communication, [34]"
Relative susceptibility to infection	aged 0-9	0.35	[35]
Relative susceptibility to infection	aged 10-19	0.69	[35]
Relative susceptibility to infection	aged 20-29	1.03	[35]
Relative susceptibility to infection	aged 30-39	1.03	[35]
Relative susceptibility to infection	aged 40-49	1.03	[35]
Relative susceptibility to infection	aged 50-59	1.03	[35]
Relative susceptibility to infection	aged 60-69	1.27	[35]
Relative susceptibility to infection	aged 70-79	1.52	[35]
Relative susceptibility to infection	aged 80+	1.52	[35]
Relative infectious rate of household interaction	2	-
Relative infectious rate of occupation interaction	1	-
Relative infectious rate of random interaction	1	-
Standard deviation of individual infectiousness multiplier	1.4	Calibrated to fit over-dispersion of offspring distribution
